# Supplementary material for: The Dose–Response Effect of Fluoride Exposure on the Gut Microbiome and Its Functional Pathways in Rats
Source: MDPI journal article supplement (doi:10.3390/metabo13111159), 2023-11-17
Supplement: s1 [file s1]

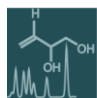

# The Dose–Response Effect of Fluoride Exposure on the Gut Microbiome and Its Functional Pathways in Rats

Zhe Mo <sup>1,2,†</sup>, Jian Wang <sup>1,†</sup>, Xinyue Meng <sup>1</sup>, Ailin Li <sup>1</sup>, Zhe Li <sup>1</sup>, Wenjun Que <sup>1</sup>, Tuo Wang <sup>1</sup>, Korto Fatti Tarnue <sup>1</sup>, Xu Ma <sup>1</sup>, Ying Liu <sup>1</sup>, Shirui Yan <sup>1</sup>, Lei Wu <sup>1</sup>, Rui Zhang <sup>1</sup>, Junrui Pei <sup>1,\*</sup> and Xiaofeng Wang <sup>2,\*</sup>

<sup>1</sup> Key Lab of Etiology and Epidemiology, Education Bureau of Heilongjiang Province & National Health Commission (23618504), Institute for Fluorosis Disease Control, Center for Endemic Disease Control, Chinese Center for Disease Control and Prevention, Harbin Medical University, Harbin 150081, China

<sup>2</sup> Department of Environmental Health, Zhejiang Provincial Center for Disease Control and Prevention, Hangzhou 310051, China

\* Correspondence: peijunrui@ems.hrbmu.edu.cn (J.P.); xfwang@cdc.zj.cn (X.W.)

† These authors contributed equally to this work.

**Table. S1 Correlation coefficient between gut microbiome in genera and fluoride exposure.**

**Table. S2 Correlation coefficient between gut microbiome in species and fluoride exposure.**

**Table. S3 Correlation coefficient between functional alterations and fluoride exposure.**

**Table S1.** Correlation coefficients between gut microbiome in genera and fluoride exposure.

| Genus                              | CAGs | Correlation Coefficient | <i>p</i> Value |
|------------------------------------|------|-------------------------|----------------|
| Allobaculum                        | 3    | 0.150                   | 0.474          |
| Anaerofilum                        | 3    | 0.217                   | 0.298          |
| Anaerofustis                       | 3    | 0.038                   | 0.857          |
| Bilophila                          | 3    | 0.501                   | 0.011          |
| Blautia                            | 3    | 0.085                   | 0.687          |
| Clostridium XVIII                  | 3    | 0.169                   | 0.418          |
| Erysipelotrichaceae incertae sedis | 3    | −0.007                  | 0.973          |
| Escherichia/Shigella               | 3    | 0.245                   | 0.238          |
| Eubacterium                        | 3    | 0.179                   | 0.392          |
| Granulicatella                     | 3    | 0.143                   | 0.495          |
| Holdemania                         | 3    | 0.429                   | 0.032          |
| Pelagibacterium                    | 3    | 0.677                   | <0.001         |
| Rothia                             | 3    | 0.376                   | 0.064          |
| Unclassified Bacillales            | 3    | −0.248                  | 0.232          |
| Unclassified Bacteria              | 3    | 0.350                   | 0.086          |
| Unclassified Ruminococcaceae       | 3    | 0.497                   | 0.011          |
| Unclassified Streptococcaceae      | 3    | 0.182                   | 0.383          |
| Anaeroplasma                       | 4    | −0.238                  | 0.252          |
| Clostridium XIVb                   | 4    | −0.234                  | 0.260          |
| Clostridium sensu stricto          | 4    | −0.320                  | 0.119          |
| Coprobacillus                      | 4    | −0.308                  | 0.134          |
| Corynebacterium                    | 4    | −0.434                  | 0.030          |
| Lachnospiracea incertae sedis      | 4    | −0.447                  | 0.025          |
| Lactonifactor                      | 4    | −0.173                  | 0.408          |
| Paenalcaligenes                    | 4    | −0.284                  | 0.169          |
| Roseburia                          | 4    | −0.479                  | 0.015          |
| Turicibacter                       | 4    | −0.490                  | 0.013          |
| Unclassified Desulfovibrionaceae   | 4    | −0.262                  | 0.205          |

**Table S2.** Correlation coefficients between gut microbiome in species and fluoride exposure.

| Species                                         | CAGs | Correlation Coef-<br>ficient | p Value |
|-------------------------------------------------|------|------------------------------|---------|
| Acetatifactor muris                             | 1    | 0.362                        | 0.075   |
| Bacteroidales bacterium ph8                     | 1    | 0.534                        | 0.006   |
| Bacteroides fragilis (T)                        | 1    | 0.507                        | 0.010   |
| Bacteroides merdae                              | 1    | 0.222                        | 0.287   |
| Bacteroides uniformis                           | 1    | 0.448                        | 0.025   |
| Candidatus Soleaferrea massiliensis             | 1    | 0.652                        | <0.001  |
| Eubacterium coprostanoligenes (T)               | 1    | 0.145                        | 0.490   |
| Gram-negative bacterium cL10-2b-4               | 1    | 0.197                        | 0.346   |
| Parabacteroides distasonis                      | 1    | 0.617                        | 0.001   |
| Parabacteroides goldsteinii                     | 1    | 0.478                        | 0.016   |
| Unclassified Alistipes                          | 1    | 0.144                        | 0.491   |
| Unclassified Allobaculum                        | 1    | 0.150                        | 0.474   |
| Unclassified Alphaproteobacteria                | 1    | 0.456                        | 0.022   |
| Unclassified Bacteroidetes                      | 1    | 0.091                        | 0.665   |
| Unclassified Bdellovibrionales                  | 1    | 0.586                        | 0.002   |
| Unclassified Butyrivimoniales                   | 1    | 0.144                        | 0.494   |
| Unclassified Clostridiales                      | 1    | 0.165                        | 0.429   |
| Unclassified Erysipelotrichaceae incertae sedis | 1    | 0.267                        | 0.198   |
| Unclassified Escherichia/Shigella               | 1    | 0.245                        | 0.238   |
| Unclassified Eubacterium                        | 1    | 0.220                        | 0.291   |
| Unclassified Odoribacter                        | 1    | 0.504                        | 0.010   |
| Unclassified Parasutterella                     | 1    | −0.032                       | 0.879   |
| Unclassified Pelagibacterium                    | 1    | 0.677                        | <0.001  |
| Unclassified Prevotellaceae                     | 1    | −0.110                       | 0.599   |
| Unclassified Ruminococcaceae                    | 1    | 0.566                        | 0.003   |
| Unclassified Ruminococcus                       | 1    | 0.193                        | 0.357   |
| Bacterium YE57                                  | 1    | 0.147                        | 0.484   |
| Uncultured Alkalibacter sp.                     | 1    | −0.079                       | 0.709   |
| Uncultured Bacillales bacterium                 | 1    | −0.154                       | 0.462   |
| Uncultured Bacteroidetes bacterium              | 1    | 0.327                        | 0.110   |
| Uncultured Desulfovibrionaceae bacterium        | 1    | 0.426                        | 0.034   |
| Uncultured Elusimicrobium sp.                   | 1    | −0.095                       | 0.651   |
| Uncultured Erysipelotrichales bacterium         | 1    | 0.432                        | 0.031   |
| Uncultured Koproionas sp.                       | 1    | 0.504                        | 0.010   |
| Uncultured bacterium adhufec108                 | 1    | 0.610                        | 0.001   |
| Uncultured eubacterium WCHB1-54                 | 1    | 0.173                        | 0.410   |
| Unidentified bacterium                          | 1    | 0.105                        | 0.618   |

**Table S3.** Correlation coefficients between functional alterations and fluoride exposure.

| Function                                                                                                | Correlation Coefficient | p Value |
|---------------------------------------------------------------------------------------------------------|-------------------------|---------|
| amino-acid N-acetyltransferase [EC:2.3.1.1]                                                             | 0.765                   | <0.001  |
| pyruvate kinase [EC:2.7.1.40]                                                                           | −0.768                  | <0.001  |
| allophanate hydrolase [EC:3.5.1.54]                                                                     | 0.769                   | <0.001  |
| adenylosuccinate synthase [EC:6.3.4.4]                                                                  | −0.762                  | <0.001  |
| F-type H <sup>+</sup> -transporting ATPase subunit a                                                    | −0.771                  | <0.001  |
| F-type H <sup>+</sup> -transporting ATPase subunit b                                                    | −0.766                  | <0.001  |
| F-type H <sup>+</sup> -transporting ATPase subunit c                                                    | −0.771                  | <0.001  |
| F-type H <sup>+</sup> -transporting ATPase subunit epsilon                                              | −0.760                  | <0.001  |
| F-type H <sup>+</sup> -transporting ATPase subunit gamma                                                | −0.783                  | <0.001  |
| cobalamin biosynthetic protein CobC                                                                     | 0.765                   | <0.001  |
| DNA polymerase III subunit gamma/tau [EC:2.7.7.7]                                                       | −0.788                  | <0.001  |
| 3D-(3,5/4)-trihydroxycyclohexane-1,2-dione acylhydrolase (decyclizing)<br>[EC:3.7.1.22]                 | 0.775                   | <0.001  |
| Fis family transcriptional regulator, factor for inversion stimulation protein                          | 0.778                   | <0.001  |
| tRNA(Ile)-lysine synthase [EC:6.3.4.19]                                                                 | −0.756                  | <0.001  |
| ribosome biogenesis GTPase / thiamine phosphate phosphatase [EC:3.6.1.-<br>3.1.3.100]                   | −0.760                  | <0.001  |
| uncharacterized protein                                                                                 | 0.752                   | <0.001  |
| adenine-specific DNA-methyltransferase [EC:2.1.1.72]                                                    | −0.758                  | <0.001  |
| MerR family transcriptional regulator, mercuric resistance operon regula-<br>tory protein               | 0.752                   | <0.001  |
| D-lyxose ketol-isomerase [EC:5.3.1.15]                                                                  | 0.818                   | <0.001  |
| D-xylose transport system permease protein                                                              | 0.757                   | <0.001  |
| hydrogenase-4 component B [EC:1.-.-.-]                                                                  | 0.751                   | <0.001  |
| two-component system, cell cycle sensor histidine kinase and response reg-<br>ulator CckA [EC:2.7.13.3] | 0.767                   | <0.001  |
| alanine-synthesizing transaminase [EC:2.6.1.-]                                                          | 0.790                   | <0.001  |
| nickel transport system permease protein                                                                | 0.772                   | <0.001  |
| succinate-semialdehyde dehydrogenase [EC:1.2.1.76]                                                      | 0.753                   | <0.001  |
| CoA-dependent NAD(P)H sulfur oxidoreductase [EC:1.8.1.18]                                               | 0.776                   | <0.001  |
| D-psicose/D-tagatose/L-ribulose 3-epimerase [EC:5.1.3.30 5.1.3.31]                                      | 0.768                   | <0.001  |
| cob(I)alamin adenosyltransferase [EC:2.5.1.17]                                                          | 0.754                   | <0.001  |
| nicotine oxidoreductase [EC:1.5.3.-]                                                                    | 0.757                   | <0.001  |
| diguanylate cyclase [EC:2.7.7.65]                                                                       | 0.757                   | <0.001  |
